# Supplementary material for: The Extremely Brilliant Source storage ring of the European Synchrotron Radiation Facility
Source: PubMed Central journal article supplement (PMC10124696; doi:10.1038/s42005-023-01195-z), 2023-04-24
Supplement: 42005_2023_1195_MOESM1_ESM.pdf [file 42005_2023_1195_MOESM1_ESM.pdf]

1 Supplementary Information for

2 “The Extremely Brilliant Source storage ring of the European Synchrotron  
3 Radiation Facility”

4 **Pantaleo Raimondi<sup>1</sup>, Chamseddine Benabderrahmane<sup>1</sup>, Paul Berkvens<sup>1</sup>,**  
5 **Jean Claude Biasci<sup>1</sup>, Pawel Borowiec<sup>1</sup>, Jean-Francois Bouteille<sup>1</sup>, Thierry**  
6 **Brochard<sup>1</sup>, Nicholas B. Brookes<sup>1</sup>✉, Nicola Carmignani<sup>1</sup>, Lee R. Carver<sup>1</sup>,**  
7 **Jean-Michel Chaize<sup>1</sup>, Joel Chavanne<sup>1</sup>, Stefano Checchia<sup>1</sup>, Yuriy Chushkin<sup>1</sup>,**  
8 **Filippo Cianciosi<sup>1</sup>, Marco Di Michiel<sup>1</sup>, Rudolf Dimper<sup>1</sup>, Alessandro D’Elia<sup>1</sup>,**  
9 **Dieter Einfeld<sup>1</sup>, Friederike Ewald<sup>1</sup>, Laurent Farvacque<sup>1</sup>, Loys Goirand<sup>1</sup>,**  
10 **Laurent Hardy<sup>1</sup>, Jorn Jacob<sup>1</sup>, Laurent Jolly<sup>1</sup>, Michael Krisch<sup>1</sup>, Gael Le Bec<sup>1</sup>,**  
11 **Isabelle Leconte<sup>1</sup>, Simone M. Liuzzo<sup>1</sup>, Cristian Maccarrone<sup>1</sup>, Thierry**  
12 **Marchial<sup>1</sup>, David Martin<sup>1</sup>, Mohamed Mezouar<sup>1</sup>, Christian Nevo<sup>1</sup>, Thomas**  
13 **Perron<sup>1</sup>, Eric Plouviez<sup>1</sup>, Harald Reichert<sup>1</sup>, Pascal Renaud<sup>1</sup>, Jean-Luc Revol<sup>1</sup>,**  
14 **Benoît Roche<sup>1</sup>, Kees-Bertus Scheidt<sup>1</sup>, Vincent Serriere<sup>1</sup>, Francesco Sette<sup>1</sup>✉,**  
15 **Jean Susini<sup>1</sup>, Laura Torino<sup>1</sup>, Reine Versteegen<sup>1</sup>, Simon White<sup>1</sup> and Federico**  
16 **Zontone<sup>1</sup>**

17 <sup>1</sup> ESRF - The European Synchrotron, 71 Avenue des Martyrs, 38000, Grenoble, France

18 ✉email: [brookes@esrf.fr](mailto:brookes@esrf.fr); [sette@esrf.fr](mailto:sette@esrf.fr)

19

20

21

22 **Supplementary Note 1: Low emittance principles**

23 The photon beam brilliance is inversely proportional to the electron beam emittance  $\varepsilon_x$  <sup>1</sup>:

24 
$$\varepsilon_x = C_q \frac{\gamma^2 I_5}{J_x I_2} \quad J_x = 1 - \frac{I_4}{I_2}$$

25 with  $C_q$  a constant,  $J_x$  the horizontal damping partition number,  $\gamma$  the relativistic Lorentz factor  
26 and  $I_n$  the synchrotron radiation integrals defined as follows, respectively:

27 
$$I_4 = \oint \frac{\eta_x}{\rho} \left( \frac{1}{\rho^2} + 2k_1 \right) ds \quad I_2 = \oint \frac{1}{\rho^2} ds \quad I_5 = \oint \frac{\mathcal{H}_x}{|\rho|^3} ds$$

28  $\rho$  is the bending radius of the dipoles,  $k_1$  the quadrupole strength and  $\eta_x$  the horizontal  
29 dispersion function. The integrals run over the whole lattice.  $\mathcal{H}_x$  is defined by the horizontal  
30 twiss parameters  $\beta_x$ ,  $\alpha_x$ , and  $\gamma_x$  and by  $\eta_x$  and  $\eta'_x$ , the horizontal dispersion function and its  
31 derivative along the beam trajectory <sup>1</sup>.

32 
$$\mathcal{H}_x = \beta_x \eta_x'^2 + 2\alpha_x \eta_x \eta'_x + \gamma_x \eta_x^2$$

33

34 For a classic double-bend achromat <sup>2</sup> these equations reduce to:

35

36 
$$\varepsilon_x^{DBA} [m. rad] = 5.036 * 10^{-13} E^2 [GeV^2] \theta^3 [deg^3]$$

37

38 where  $E$  is the electron beam energy and  $\theta$  the average angle per dipole.

39 Low emittance can therefore be achieved with:

40 1) low  $\beta_x$ , and  $\eta_x$  at dipoles to reduce  $\mathcal{H}_x$ ,

41 2) a large number of low-angle ( $\theta$ ) dipoles and

42 3) combined function magnets with focusing gradient  $k_1$  and bending angle to increase  $J_x$ .

43

44

45 **Supplementary Note 2:**

46 Supplementary Figures 1a-c shows a comparison of different synchrotron light source lattice  
47 cells for storage rings with  $E_0 = 6$  GeV and 32 cells. The figures also show the electron beam  
48 emittance ( $\epsilon_x$ ) for the different lattice cells. The characteristics of the considered lattice cells  
49 are given below.

50

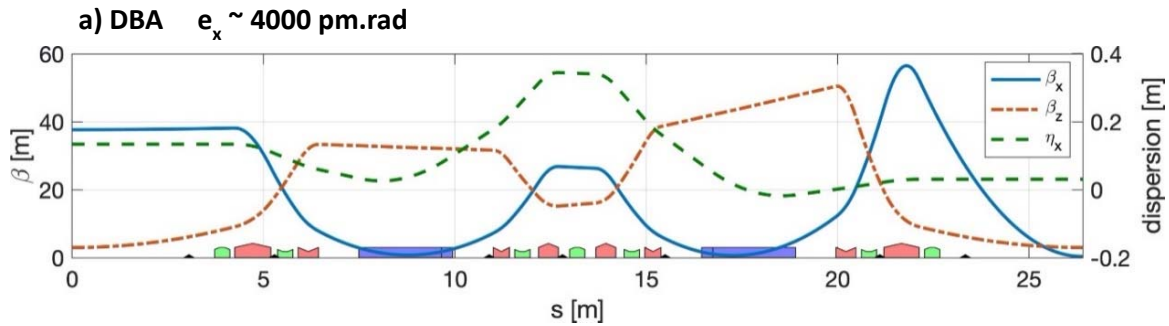

51

52

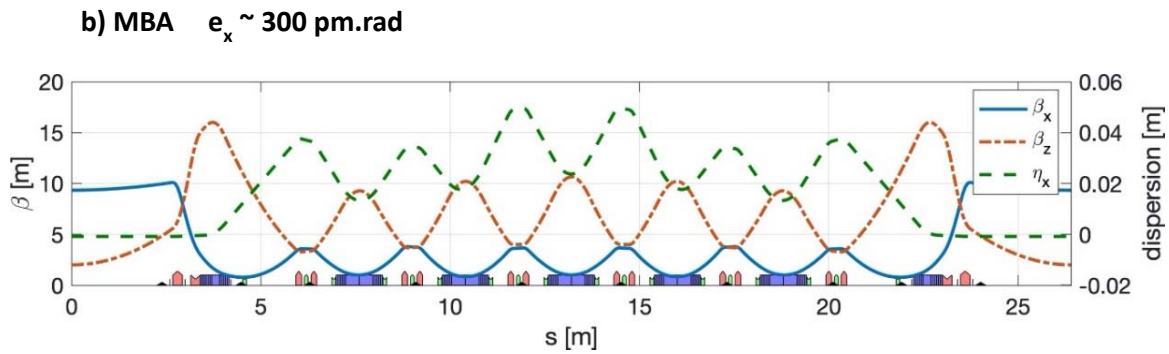

53

54

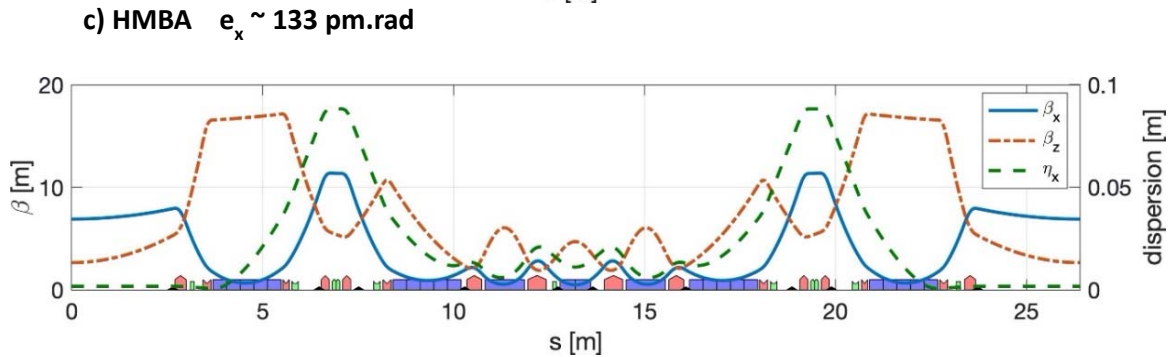

55

56 **Supplementary Figure 1: comparison of different synchrotron light source lattice cells**  
57 **for storage rings with  $E_0 = 6$  GeV and 32 cells.** Supplementary Figures 1a, b and c are for the  
58 Double-Bend-Achomat (DBA), Multi-Bend-Achomat (MBA) and Hybrid-Multi-Bend-  
59 Achomat (HMBA) lattice cells, respectively.

60

61

62 **Double-Bend-Achromat (DBA) (first light in 1992).  $\epsilon_x \sim 4000$  pm.rad**

63 Characteristics:

64 1) small horizontal  $\beta$  and dispersion at dipoles (see Supplementary Note 1)

65 2) large dispersion at sextupoles.

66 **Multi-Bend-Achromat (MBA) (first light in 2015).  $\epsilon_x \sim 300$  pm.rad**

67 Characteristics:

68 1) more dipoles with less field (see Supplementary Note 1)

69 2) dipole-quadrupoles ( $J_x > 1$ ), 3) octupoles (see Supplementary Note 1).

70 **Hybrid-Multi-Bend-Achromat (HMBA) (first light 2019).  $\epsilon_x \sim 133$  pm.rad**

71 Characteristics:

72 1) all features of MBA

73 2) two large localized dispersion bumps as in DBA to increase sextupole efficiency

74 3) almost exact  $-I$  transformation (see Supplementary Note 4) between sextupoles pairs to  
75 locally cancel sextupolar aberrations

76 4) longitudinal gradient dipoles to increase dispersion at sextupoles

77 5) increased dipole filling ratio.

78

79 **Supplementary Note 3: Natural chromaticity correction**

80 Given a lattice layout (DBA, MBA, HMBA) with dipoles and quadrupoles, the sextupoles are  
81 set such that the natural chromaticity  $\xi_{x,y}$  introduced by the integrated quadrupole strengths  
82 ( $b_2L$ ) is neutralized or overcompensated using sextupoles with integrated strength  $b_3L$  to allow  
83 as large as possible off-momentum phase space stability and thus long lifetimes and stable high  
84 charge bunches. In this case the chromaticity is defined as

85 
$$\xi_{x,y} = \frac{1}{4\pi} \left( \sum_n^{N_{sext}} 2b_3L\eta_{x,y}\beta_{x,y} - \sum_n^{N_{quad}} b_2L\beta_{x,y} \right),$$

86 where  $\eta_{x,y}$  and  $\beta_{x,y}$  are the horizontal and vertical dispersion and  $\beta$ -functions and  $N_{sext}$  and  
87  $N_{quad}$  the number of sextupoles and quadrupoles present in the lattice. This determines the  
88 sextupole strengths, ( $b_3L$ ) excluding further non-linear optimization, that are inversely  
89 proportional to the dispersion and  $\beta$ -functions at sextupoles. Large  $\beta$ -functions and dispersion  
90 at the sextupoles will therefore allow to reduce their strengths <sup>1</sup>.

91 For the specific case of low emittance lattices that generally feature small dispersion (low  
92 dipole fields) and small  $\beta$ -functions, this can lead to strong sextupole strength, potentially  
93 reaching technological limits.

94

95 **Supplementary Note 4: The  $-I$  transformation between sextupoles**

96 With  $b_3L$  the sextupole integrated strength and  $x, x', y, y'$  the position and angle in the  
 97 horizontal and vertical planes, the electron-optical effect of a sextupole can be  
 98 represented as a coordinates transformation by the transfer matrix  $\mathcal{M}_s$ :

$$99 \quad \begin{pmatrix} x \\ x' \\ y \\ y' \end{pmatrix} = \mathcal{M}_s \begin{pmatrix} x_0 \\ x_0' \\ y_0 \\ y_0' \end{pmatrix}, \quad \begin{pmatrix} x \\ x' \\ y \\ y' \end{pmatrix} = \begin{pmatrix} 1 & 0 & 0 & 0 \\ -0.5b_3Lx_0 & 1 & 0.5b_3Ly_0 & 0 \\ 0 & 0 & 1 & 0 \\ 0 & 0 & b_3Lx_0 & 1 \end{pmatrix} \begin{pmatrix} x_0 \\ x_0' \\ y_0 \\ y_0' \end{pmatrix},$$

100

101 If the matrix representing the region of the lattice between two consecutive sextupoles is  
 102 exactly  $-I$  (minus identity), as shown in supplementary Fig. 2, and we neglect the  
 103 presence of other sextupoles, then

$$104 \quad \mathcal{M}_t = \mathcal{M}_s(x_0, y_0) \cdot (-\mathbb{I}) \cdot \mathcal{M}_s(-x_0, y_0) = -I$$

105 the distortions introduced by the first sextupole at first order are cancelled by the  
 106 sextupole with identical field at the other side of the  $-I$  region.

107

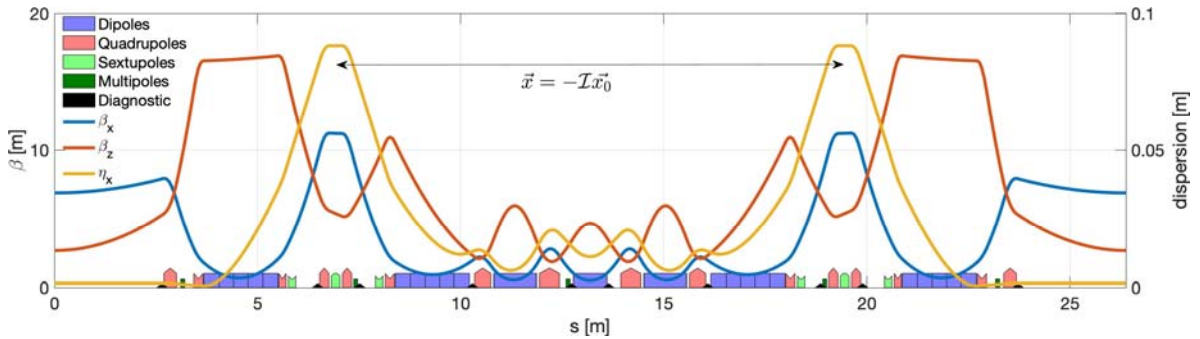

108

109 **Supplementary Figure 2: Lattice functions and magnet layout for the Hybrid Multi-Bend**  
 110 **Achromat (HMBA) Synchrotron standard cell.** The Dipoles, quadrupoles, sextupoles,  
 111 multipoles and diagnostic elements along the cell (position  $s$ ) are shown as violet, pink, light  
 112 green, dark green and black symbols respectively. The  $\beta_x$ ,  $\beta_z$ , and  $\eta_x$  parameters are shown as  
 113 blue, red and orange lines respectively. Reproduced by permission <sup>3</sup>.

114

115 The  $-I$  transformation is obtained by tuning the quadrupoles gradients such that the  
 116 optics phase advance is an odd multiple of  $\pi$  ( $\phi_x=3\pi$ ,  $\phi_y=\pi$ ). The effect of the  $-I$   
 117 transformation between sextupole pairs is shown by electron beam tracking simulation  
 118 for the HMBA cell in the figure below (Supplementary Fig. 3).

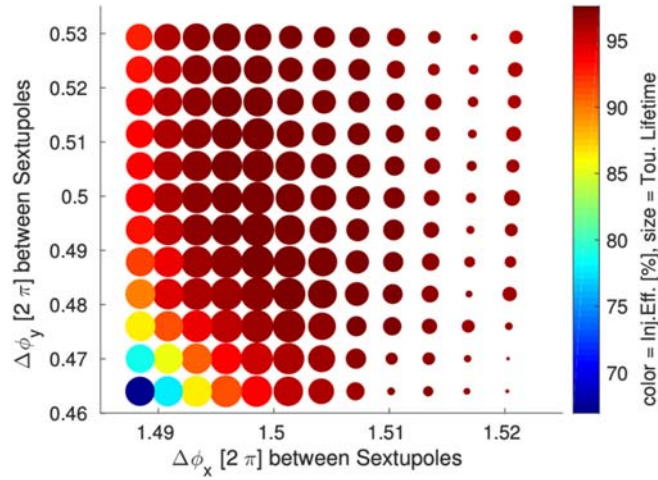

119

120 **Supplementary Figure 3: electron beam tracking simulation for the HMBA cell**

121 When moving away from the phase advances ( $\phi_x=3\pi$ ,  $\phi_y=\pi$ ) generating the  $-I$   
 122 transformation, either the Touschek lifetime<sup>4</sup> or the injection efficiency are negatively  
 123 affected. The presence of interleaved sextupoles, makes the optimum phase advances  
 124 deviate slightly from the theoretical ( $\phi_x=3\pi$ ,  $\phi_y=\pi$ ).

125

126 **Supplementary Note 5: Undulator radiation**

127

128 Undulators create a periodic magnetic field perpendicular to the electron path, which introduces  
129 by the *Lorentz* force a periodic transverse undulation of the electron trajectory. The radiations  
130 emitted at each period interfere. This leads to a photon spectrum with narrow intense peaks. In  
131 such case, the photon spectrum shows narrow intense peaks<sup>5,6,7</sup> (harmonics) at specific photon  
132 energies. An undulator is characterised by its deflection parameter, defined as

133 
$$K = \frac{eB_0\lambda_0}{2\pi mc}$$

134 where  $e$  is the elementary charge,  $B_0$  and  $\lambda_0$  are the undulator peak magnetic field and period  
135 length,  $m$  the electron mass and  $c$  the speed of light. The resonant wavelength on-axis is

136 
$$\lambda = \frac{\lambda_0}{2\gamma^2 n} \left( 1 + \frac{K^2}{2} \right)$$

137  $n$  being the harmonic number and  $\gamma$  the relativistic Lorentz factor. The photon flux reaches a  
138 maximum at  $K \approx 1.2$  for the fundamental and at higher  $K$  values for higher harmonics. For a  
139 Gaussian photon beam and a single electron, the *diffraction limited* X-ray source size and  
140 divergence are respectively

141 
$$\sigma_n = \sqrt{\lambda L / \pi} \text{ and } \sigma'_n = \sqrt{\lambda / 2L}$$

142  $L$  being the undulator length and  $\lambda$  the X-ray wavelength.

143

144



145 **Supplementary Note 6: Spectral flux, coherence and brilliance**

146

147 A single electron produces transversally coherent radiation.

148 However, the finite electron bunch size

149 
$$\sigma_{x,y} = \sqrt{\epsilon_{x,y} \beta_{x,y} + \eta_{x,y}^2 \delta_E^2}$$

150

and divergence

151

$$\sigma'_{x,y} = \sqrt{\epsilon_{x,y} \gamma_{x,y} + \eta'_{x,y}{}^2 \delta_E^2}$$

152  $\delta_E$  being the energy spread of the electron beam, result in partially coherent radiation <sup>8</sup> with

153 photon source size  $\Sigma_{X,Y} = \sqrt{\sigma_n^2 + \sigma_{X,Y}^2}$  and divergence  $\Sigma'_{X,Y} = \sqrt{\sigma'_n{}^2 + \sigma'_{X,Y}{}^2}$ .

154 In practice, the radiation is coherent in the vertical plane and partially coherent in the horizontal  
155 plane, due to the ellipsoidal shape of the electron beam.

156 The apparent brilliance of the source, defined as  $= \frac{F}{\Sigma_X \Sigma'_X \Sigma_Y \Sigma'_Y}$ , combines the spectral flux  $F$  and  
157 the source sizes and divergences: high brilliance means a large number of photons in a small  
158 phase space volume, i.e. a large coherent flux. The brilliance can be interpreted as the  
159 distribution of photons in the phase space and is linked to the Wigner distribution of the electric  
160 field <sup>9, 10, 11, 12, 13, 14, 15, 16, 17</sup>.

161

162 **Supplementary Note 7: Sources of errors in storage rings**

163

164 The design of a particle accelerator is based on an ideal model that assumes a perfectly aligned  
165 machine without magnetic field errors. In reality, misalignments and field errors, mostly  
166 determined by the mechanical tolerances of the magnets and the calibration of the current-to-  
167 field transfer functions, cannot be avoided. These are estimated during the design phase and  
168 the so-called design parameters represent the average of multiple seeds of errors.

169 We generally classify machine imperfections from the multipoles excited by such errors, and  
170 consequently the magnet type used to correct them:

171

- 172 • dipole errors will introduce beam displacements throughout the storage ring that can  
173 be described as follows <sup>1</sup>:

174

$$\Delta u = \sum_k M_{12}(s_m | s_k) \Theta_k$$

175

176 where  $\Delta u$  is the displacement of the beam at the location  $s_m$  due to many dipole-field errors  
177  $\Theta_k$  at locations  $s_k$ , and  $M_{12}$  is the transfer matrix from the perturbation  $s_k$  to the observation  
178 point  $s_m$ . The main contribution to dipole-field errors are unwanted dipole-field components,  
179 quadrupole misalignments or beam offset in quadrupole magnets.

180

181 Quadrupole-field errors will introduce a betatron tune shift and linear optics  
182 perturbations that will break the lattice properties described in the previous section and  
183 consequently degrade the lifetime, injection efficiency and emittance of the machine. The main  
184 contributors to quadrupole-field errors are unwanted quadrupole field components, sextupole  
185 misalignments or beam offset in sextupole magnets.

186

187 Reducing these errors enables the storage ring to operate closer to the ideal model, and thus  
188 improve performance. The strength of the corrections applied to bring the machine towards its  
189 ideal model is therefore a good indicator of how well the components have been manufactured  
190 and the storage ring assembled.

191

192 **Supplementary Note 8: Orbit and optics correction**

193 Good control of the closed orbit and linear optics are essential to achieve the design  
194 performance of the accelerator. The closed orbit is measured using beam position monitors and  
195 then minimized using dipole correctors. To do so, Single Value Decomposition inversion<sup>18</sup> is  
196 used to minimize to sum of the squares of the orbit distortions at the beam position monitors<sup>1</sup> :

197 
$$(u_m - \Delta u_m)_{min}^2 = (u_m - M \Theta_n)_{min}^2$$

198 where  $u_m$  is the measured position at monitor  $m$ ,  $M$  is the orbit response matrix of all the  
199 correctors  $n$  and  $\Theta_n$  are the vectors of the strength applied to the dipole correctors to minimize  
200 perturbations. Similarly, linear optics are corrected using quadrupole correctors by inverting a  
201 matrix of the beam response to quadrupole perturbations.

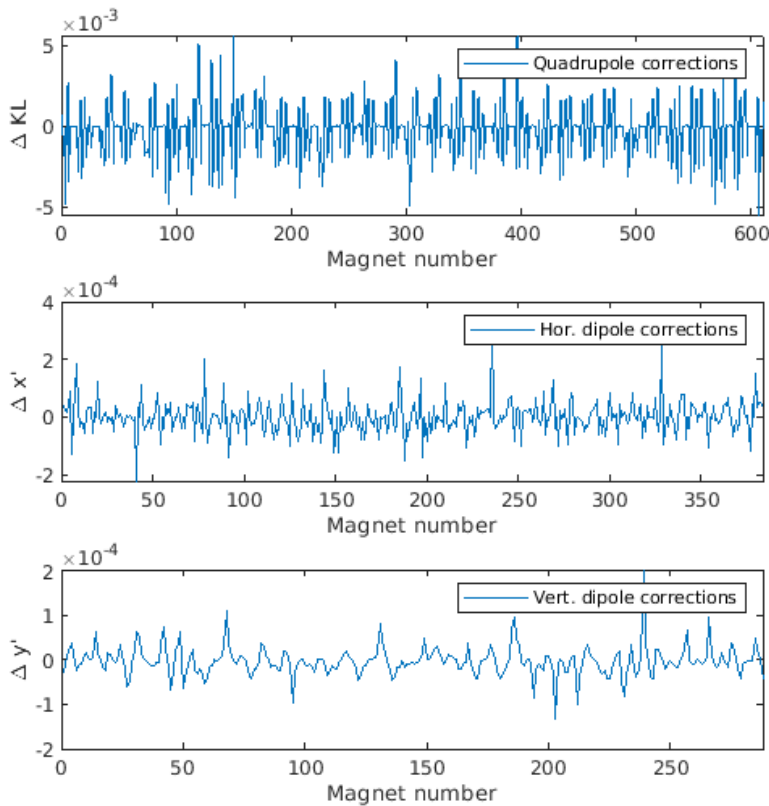

202 **Supplementary Figure 4: Magnetic corrections applied to ESRF-EBS storage ring.**

203 The figure shows the magnetic corrections applied to the ESRF-EBS storage ring. All  
204 corrections are below the expected values from the error model as shown in Supplementary  
205 Table 3.

206

207 **Supplementary Table 3:**208 **Measured and model rms corrections, closed orbit and optics errors.**

|                    | unit               | Measured             | Model                |
|--------------------|--------------------|----------------------|----------------------|
| Gradient corr.     | [m <sup>-1</sup> ] | 1.7 10 <sup>-3</sup> | 2.6 10 <sup>-3</sup> |
| Dipole corr. [H/V] | μrad               | 65/30                | 160/120              |
| β-beating          | %                  | 1-2 ±2               | 1                    |
| Closed orbit [H/V] | μm                 | 55/55                | 140/80               |

209

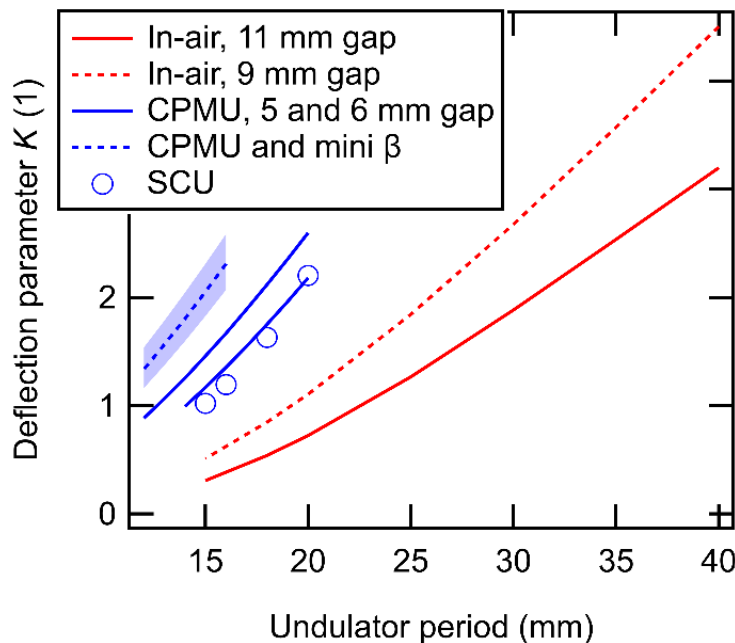

210

211

212

213 **Supplementary Figure 5: Undulator deflection parameter versus period, for different**  
 214 **undulator technologies.** In a first approximation, the peak magnetic field varies as

215  $B \propto \text{Exp}((-πg) / λ_0)$ , where  $g$  is the magnetic gap. The parameter  $K$  varies with  $λ_0$ ,  
 216 resulting in small deflections, limited flux and poor tunability at short periods. At the ESRF,  
 217 most of the undulators are installed around a 10 mm vacuum chamber with a minimum gap of  
 218 11 mm. Prototype vacuum chambers with 8 mm thickness will be installed for tests, allowing  
 219 the installation of undulators with a gap of 9 mm. The CPMUs are operated at gaps in the 5 to  
 220 6 mm range, depending on their length. Operated at 77 K in most cases, they compete with  
 221 Super-Conducting Undulators operated at helium temperature due to their smaller magnetic  
 222 gaps. Reducing the vertical size of the beam by means of a mini-β setup would allow to install  
 223 devices with ultra-small gap. The minimum gap of such devices is not determined yet but is  
 224 expected to be at least in the 3.5 to 4 mm range.

225

1. Wiedemann, H., *Particle Accelerator Physics* (Springer Berlin Heidelberg, 2007).
2. Chao, A. W., Mess, K. H., Tigner, M. & Zimmermann, F., *Handbook of Accelerator Physics and Engineering* (WORLD SCIENTIFIC, Copenhagen, 2012).
3. Raimondi, P. *et al.*, Commissioning of the hybrid multibend achromat lattice at the European Synchrotron Radiation Facility. *Physical Review Accelerators and Beams* **24**, 110701 (2021).
4. Bernardini, C. *et al.*, Lifetime and Beam Size in a Storage Ring. *Physical Review Letters* **10**, 407–409 (1963).
5. Walker, R. P., Insertion Devices: Undulators and Wigglers. *CERN Accelerator School on Synchrotron Radiation and Free Electron Laser*. (1996).
6. Elleaume, P. *Undulator, Wigglers and their applications*, H. Onuki and P. Elleaume, Editors. 2003, Taylor & Francis., 69-107 (2003).
7. Clarke, J. A., *The Science and Technology of Undulators and Wigglers* (Oxford University Press, 2004).
8. Vartanyants, I. A. & Singer, A., Coherence properties of hard x-ray synchrotron sources and x-ray free-electron lasers. *New Journal of Physics* **12**, 035004 (2010).
9. Nash, B. *et al.*, Detailed x-ray brightness calculations in the sirepo GUI for SRW. *AIP Conference Proceedings* **2054**, 060080 (2019).
10. Nash, B. *et al.*, Undulator radiation brightness calculations in the Sirepo GUI for SRW. *Advances in Laboratory-based X-Ray Sources, Optics, and Applications VII* **11110K** (2019).
11. Bazarov, I. V., Synchrotron radiation representation in phase space. *Physical Review Special Topics - Accelerators and Beams* **15**, 050703 (2012).
12. Kim, K.-J., Brightness, coherence and propagation characteristics of synchrotron radiation. *Nuclear Instruments and Methods in Physics Research Section A: Accelerators, Spectrometers, Detectors and Associated Equipment* **246**, 71–76 (1986).
13. Geloni, G., Kocharyan, V. & Saldin, E., Brightness of synchrotron radiation from wigglers. *Nuclear Instruments and Methods in Physics Research Section A: Accelerators, Spectrometers, Detectors and Associated Equipment* **807**, 13–29 (2016).
14. Geloni, G., Kocharyan, V. & Saldin, E., Brightness of synchrotron radiation from undulators and bending magnets. *Journal of synchrotron radiation* **22**, 288-316 (2015).
15. Geloni, G., Serkez, S., Khubbutdinov, R., Kocharyan, V. & Saldin, E., Effects of energy spread on brightness and coherence of undulator sources. *Journal of Synchrotron Radiation* **25**, 1335–1345 (2018).

16. Tanaka, T. & Kitamura, H., Universal function for the brilliance of undulator radiation considering the energy spread effect. *Journal of Synchrotron Radiation* **16**, 380–386 (2009).
17. Walker, R. P., Undulator radiation brightness and coherence near the diffraction limit. *Physical Review Accelerators and Beams* **22**, 328–337 (2019).
18. Y. Chung & K. Evans, J., Closed Orbit Correction Using Singular Value Decomposition of the Response Matrix. *Proceedings of the 1993 Particle Accelerator Conference 1993, in Washington, D.C.*, 2263-2265 (1993).

228

229
